# Supplementary material for: Different Sources of Allelic Variation Drove Repeated Color Pattern Divergence in Cichlid Fishes
Source: PubMed Central journal article supplement — Mol Biol Evol. 2020 Sep 17;38(2):465–77. doi: 10.1093/molbev/msaa237 (PMC7826197; doi:10.1093/molbev/msaa237), 2020-09-17
Supplement: msaa237_supplementary_data.pdf [file msaa237_supplementary_data.pdf]

**Supplementary Materials for**

**Different sources of allelic variation drove repeated color pattern divergence in  
cichlid fishes**

Sabine Urban, Alexander Nater, Axel Meyer, and Claudius F. Kratochwil

Correspondence to: Claudius F. Kratochwil ([claudius.kratochwil@uni-konstanz.de](mailto:claudius.kratochwil@uni-konstanz.de)) or  
Axel Meyer ([axel.meyer@uni-konstanz.de](mailto:axel.meyer@uni-konstanz.de))

**Table S1. Summary of all samples used in this study.** The short-read data has been archived in the NCBI SRA database under the bioproject accession number PRJNA 649899.

| Species                               | Current status (Eichmeyer 2020)         | Tribus       | Accession | raw reads | Source                | Type   | Lake       | stripes | Coverage | Picture Reference                                                                                             |
|---------------------------------------|-----------------------------------------|--------------|-----------|-----------|-----------------------|--------|------------|---------|----------|---------------------------------------------------------------------------------------------------------------|
| <i>Neolamprologus brichard</i>        | <i>Neolamprologus pichard</i> (synonym) | Lamprologini | SR077332  | 35686075  | Brichard et al., 2014 | Genome | Tanganyika | no      | 32.23    | Credit: Jan Gerwin, Claudius Kratochwil, Sabine Urban                                                         |
| <i>Oreochromis niloticus</i>          | <i>Oreochromis niloticus</i>            | Oreochromini | RR2752240 | 143645232 | Joohi et al., 2018    | Genome | Ivoryline  | no      | 23.30    | Figbase 2017                                                                                                  |
| <i>Atilapia gadihayi</i>              | <i>Atilapia gadihayi</i>                | Napochromini | RR299206  | 98559853  | Malinak et al., 2018  | Genome | Malawi     | no      | 10.00    | Figbase 2017                                                                                                  |
| <i>Atilapia macrodactylum</i>         | <i>Atilapia macrodactylum</i>           | Napochromini | RR271653  | 33346330  | Malinak et al., 2018  | Genome | Malawi     | no      | 9.07     | Figbase 2017                                                                                                  |
| <i>Atilapia parvifasciata</i>         | <i>Atilapia parvifasciata</i>           | Napochromini | RR271509  | 14661685  | Malinak et al., 2018  | Genome | Malawi     | no      | 24.38    | Figbase 2017                                                                                                  |
| <i>Atilapia chiboti</i>               | <i>Atilapia chiboti</i>                 | Napochromini | RR1749532 | 352204038 | Malinak et al., 2018  | Genome | Malawi     | no      | 34.68    | Figbase 2017, Credit: Jan Gerwin, Claudius Kratochwil, Sabine Urban                                           |
| <i>Atilapia biyelei</i>               | <i>Atilapia biyelei</i>                 | Napochromini | RR1822253 | 26388443  | Malinak et al., 2018  | Genome | Malawi     | yes     | 45.15    | Figbase 2017                                                                                                  |
| <i>Atilapia callipera</i>             | <i>Atilapia callipera</i>               | Napochromini | RR175540  | 176133032 | Malinak et al., 2018  | Genome | Malawi     | no      | 30.33    | Figbase 2017                                                                                                  |
| <i>Atilapia tweddlei</i>              | <i>Atilapia tweddlei</i>                | Napochromini | RR1743779 | 342274640 | Malinak et al., 2018  | Genome | Malawi     | no      | 41.27    | Figbase 2017                                                                                                  |
| <i>Aulonocara sp. gold</i>            | <i>Aulonocara kornelise</i>             | Napochromini | RR175499  | 143974048 | Malinak et al., 2018  | Genome | Malawi     | no      | 25.15    | Figbase 2017, <a href="https://www.malawi.guru.de">https://www.malawi.guru.de</a>                             |
| <i>Aulonocara shawi</i>               | <i>Aulonocara shawi</i>                 | Napochromini | RR175528  | 12055447  | Malinak et al., 2018  | Genome | Malawi     | yes     | 30.00    | Figbase 2017, sensuonly fish                                                                                  |
| <i>Aulonocara zawi</i>                | <i>Aulonocara shawi</i> (synonym)       | Napochromini | RR174705  | 29257952  | Malinak et al., 2018  | Genome | Malawi     | no      | 4.86     | Figbase 2017                                                                                                  |
| <i>Buccochromis notostani</i>         | <i>Buccochromis notostani</i>           | Napochromini | RR1749420 | 22534030  | Malinak et al., 2018  | Genome | Malawi     | no      | 38.58    | Figbase 2017, Credit: Jan Gerwin, Claudius Kratochwil, Sabine Urban                                           |
| <i>Buccochromis rhodesi</i>           | <i>Buccochromis rhodesi</i>             | Napochromini | RR266492  | 60624380  | Malinak et al., 2018  | Genome | Malawi     | no      | 10.40    | Figbase 2017                                                                                                  |
| <i>Champochromis caeruleus</i>        | <i>Champochromis caeruleus</i>          | Napochromini | RR175494  | 143772556 | Malinak et al., 2018  | Genome | Malawi     | no      | 24.84    | Figbase 2017                                                                                                  |
| <i>Chelochromis euchilus</i>          | <i>Chelochromis euchilus</i>            | Napochromini | RR1749533 | 186444176 | Malinak et al., 2018  | Genome | Malawi     | yes     | 31.94    | Figbase 2017, Credit: Jan Gerwin, Claudius Kratochwil, Sabine Urban                                           |
| <i>Chilotapia rhodesi</i>             | <i>Chilotapia rhodesi</i>               | Napochromini | RR175491  | 133275799 | Malinak et al., 2018  | Genome | Malawi     | yes     | 23.20    | Credit: Jan Gerwin, Claudius Kratochwil, Sabine Urban                                                         |
| <i>Chromis elongatus</i>              | <i>Chromis elongatus</i>                | Napochromini | RR1749537 | 18954983  | Malinak et al., 2018  | Genome | Malawi     | no      | 37.39    | igsnat.at                                                                                                     |
| <i>Copadichromis baroti</i>           | <i>Copadichromis baroti</i>             | Napochromini | RR175506  | 133760518 | Malinak et al., 2018  | Genome | Malawi     | no      | 23.88    | Figbase 2017, Konings 2008, Credit: Jan Gerwin, Claudius Kratochwil, Sabine Urban                             |
| <i>Copadichromis mitis</i>            | <i>Copadichromis mitis</i>              | Napochromini | RR1826494 | 36638544  | Malinak et al., 2018  | Genome | Malawi     | no      | 6.56     | Konings 2008                                                                                                  |
| <i>Copadichromis quadrinotatus</i>    | <i>Copadichromis quadrinotatus</i>      | Napochromini | RR299203  | 40755174  | Malinak et al., 2018  | Genome | Malawi     | no      | 8.45     | Konings 2008                                                                                                  |
| <i>Copadichromis trimaculatus</i>     | <i>Copadichromis trimaculatus</i>       | Napochromini | RR175490  | 126152148 | Malinak et al., 2018  | Genome | Malawi     | no      | 21.77    | Konings 2008                                                                                                  |
| <i>Copadichromis virgatus</i>         | <i>Copadichromis virgatus</i>           | Napochromini | RR1749451 | 367294778 | Malinak et al., 2018  | Genome | Malawi     | no      | 45.83    | Figbase 2017, Konings 2008                                                                                    |
| <i>Crenochromis pectoralis</i>        | <i>Crenochromis pectoralis</i>          | Napochromini | RR174779  | 30001683  | Malinak et al., 2018  | Genome | Malawi     | no      | 21.71    | Figbase 2017                                                                                                  |
| <i>Cyanopharynx ester medius</i>      | <i>Cyanopharynx ester medius</i>        | Napochromini | RR175492  | 133427275 | Malinak et al., 2018  | Genome | Malawi     | no      | 22.73    | Figbase 2017                                                                                                  |
| <i>Cyanopharynx nitidus</i>           | <i>Cyanopharynx nitidus</i>             | Napochromini | RR175498  | 137546484 | Malinak et al., 2018  | Genome | Malawi     | no      | 23.80    | Konings 2008                                                                                                  |
| <i>Cyanochromis obliquatus</i>        | <i>Cyanochromis obliquatus</i>          | Napochromini | RR175510  | 133305540 | Malinak et al., 2018  | Genome | Malawi     | yes     | 22.97    | Figbase 2017                                                                                                  |
| <i>Cynotilapia alba</i>               | <i>Cynotilapia alba</i>                 | Napochromini | RR175504  | 127148763 | Malinak et al., 2018  | Genome | Malawi     | no      | 21.93    | Figbase 2017, Credit: Jan Gerwin, Claudius Kratochwil, Sabine Urban                                           |
| <i>Cynotilapia aneides</i>            | <i>Cynotilapia aneides</i>              | Napochromini | RR175508  | 128806010 | Malinak et al., 2018  | Genome | Malawi     | no      | 22.41    | Figbase 2017                                                                                                  |
| <i>Cyrtocara moorii</i>               | <i>Cyrtocara moorii</i>                 | Napochromini | RR1757756 | 225816323 | Malinak et al., 2018  | Genome | Malawi     | no      | 38.63    | Figbase 2017, Credit: Jan Gerwin, Claudius Kratochwil, Sabine Urban                                           |
| <i>Dendrochromis compressipes</i>     | <i>Dendrochromis compressipes</i>       | Napochromini | RR175502  | 14439386  | Malinak et al., 2018  | Genome | Malawi     | yes     | 24.97    | Figbase 2017, Credit: Jan Gerwin, Claudius Kratochwil, Sabine Urban                                           |
| <i>Dendrochromis kwanae</i>           | <i>Dendrochromis kwanae</i>             | Napochromini | RR1821249 | 22383118  | Malinak et al., 2018  | Genome | Malawi     | yes     | 10.00    | Konings 2008                                                                                                  |
| <i>Dendrochromis strigatus</i>        | <i>Dendrochromis strigatus</i>          | Napochromini | RR1749428 | 23976681  | Malinak et al., 2018  | Genome | Malawi     | no      | 39.28    | Figbase 2017, Credit: Jan Gerwin, Claudius Kratochwil, Sabine Urban                                           |
| <i>Diploleodon aegon</i>              | <i>Diploleodon aegon</i>                | Napochromini | RR1749443 | 211762984 | Malinak et al., 2018  | Genome | Malawi     | no      | 36.19    | Konings 2008                                                                                                  |
| <i>Diploleodon limnotilapia</i>       | <i>Diploleodon limnotilapia</i>         | Napochromini | RR1749520 | 278083573 | Malinak et al., 2018  | Genome | Malawi     | no      | 47.72    | Konings 2008                                                                                                  |
| <i>Diploleodon macrops</i>            | <i>Diploleodon macrops</i>              | Napochromini | RR175517  | 148707032 | Malinak et al., 2018  | Genome | Malawi     | no      | 25.53    | Konings 2008                                                                                                  |
| <i>Psilochromis notostani</i>         | <i>Psilochromis notostani</i>           | Napochromini | RR175516  | 128991046 | Malinak et al., 2018  | Genome | Malawi     | yes     | 22.24    | Figbase 2017                                                                                                  |
| <i>Baryochromis mento</i>             | <i>Baryochromis mento</i>               | Napochromini | RR175513  | 129147423 | Malinak et al., 2018  | Genome | Malawi     | no      | 23.24    | Konings 2008                                                                                                  |
| <i>Baryochromis kwanae</i>            | <i>Baryochromis kwanae</i>              | Napochromini | RR1749524 | 222089937 | Malinak et al., 2018  | Genome | Malawi     | no      | 32.48    | Konings 2008                                                                                                  |
| <i>Benthochromis curvifasciata</i>    | <i>Benthochromis curvifasciata</i>      | Napochromini | RR1808176 | 135715686 | Malinak et al., 2018  | Genome | Malawi     | no      | 22.67    | Figbase 2017                                                                                                  |
| <i>Biotropheus sprangeri</i>          | <i>Biotropheus sprangeri</i>            | Napochromini | RR175515  | 137350539 | Malinak et al., 2018  | Genome | Malawi     | no      | 23.68    | Figbase 2017                                                                                                  |
| <i>Labrotropheus kullbarki</i>        | <i>Labrotropheus kullbarki</i>          | Napochromini | RR1749546 | 22700455  | Malinak et al., 2018  | Genome | Malawi     | yes     | 38.93    | Figbase 2017                                                                                                  |
| <i>Labrotropheus trewavaseae</i>      | <i>Labrotropheus trewavaseae</i>        | Napochromini | RR1749540 | 228874376 | Malinak et al., 2018  | Genome | Malawi     | no      | 39.25    | Figbase 2017                                                                                                  |
| <i>Lethrinops albus</i>               | <i>Lethrinops albus</i>                 | Napochromini | RR1747679 | 33152752  | Malinak et al., 2018  | Genome | Malawi     | no      | 5.65     | Credit: Jan Gerwin, Claudius Kratochwil, Sabine Urban, Konings 2008                                           |
| <i>Lethrinops auratus</i>             | <i>Lethrinops auratus</i>               | Napochromini | RR1747683 | 32789837  | Malinak et al., 2018  | Genome | Malawi     | no      | 10.00    | Konings 2008                                                                                                  |
| <i>Lethrinops bluei</i>               | <i>Lethrinops bluei</i>                 | Napochromini | RR1757175 | 19625506  | Malinak et al., 2018  | Genome | Malawi     | no      | 31.60    | Figbase 2017                                                                                                  |
| <i>Lethrinops lethrinus</i>           | <i>Lethrinops lethrinus</i>             | Napochromini | RR181530  | 44359375  | Malinak et al., 2018  | Genome | Malawi     | yes     | 9.28     | Konings 2008                                                                                                  |
| <i>Lethrinops longimanus 'headst'</i> | <i>Lethrinops longimanus</i>            | Napochromini | RR299202  | 52681058  | Malinak et al., 2018  | Genome | Malawi     | no      | 8.95     | Konings 2008                                                                                                  |
| <i>Lethrinops longimanus</i>          | <i>Lethrinops longimanus</i>            | Napochromini | RR1749437 | 351763027 | Malinak et al., 2018  | Genome | Malawi     | no      | 45.18    | Konings 2008                                                                                                  |
| <i>Maylandia ermitas</i>              | <i>Maylandia ermitas</i>                | Napochromini | RR1749446 | 23866766  | Malinak et al., 2018  | Genome | Malawi     | no      | 40.89    | Konings 2008                                                                                                  |
| <i>Maylandia bahobibi</i>             | <i>Maylandia bahobibi</i>               | Napochromini | RR1749449 | 23140461  | Malinak et al., 2018  | Genome | Malawi     | no      | 39.07    | Konings 2008                                                                                                  |
| <i>Maylandia zebra</i>                | <i>Maylandia zebra</i>                  | Napochromini | RR1749503 | 25223923  | Malinak et al., 2018  | Genome | Malawi     | no      | 43.14    | Credit: Jan Gerwin, Claudius Kratochwil, Sabine Urban                                                         |
| <i>Maylandia zarul</i>                | <i>Maylandia zarul</i>                  | Napochromini | RR1749505 | 39814903  | Malinak et al., 2018  | Genome | Malawi     | no      | 15.67    | Credit: Jan Gerwin, Claudius Kratochwil, Sabine Urban                                                         |
| <i>Mylochromis anaphthalmus</i>       | <i>Mylochromis anaphthalmus</i>         | Napochromini | RR1749443 | 23232872  | Malinak et al., 2018  | Genome | Malawi     | no      | 39.88    | Figbase 2017                                                                                                  |
| <i>Mylochromis erici</i>              | <i>Mylochromis erici</i>                | Napochromini | RR1801374 | 114840274 | Malinak et al., 2018  | Genome | Malawi     | no      | 19.63    | Konings 2008                                                                                                  |
| <i>Mylochromis lateralis</i>          | <i>Mylochromis lateralis</i>            | Napochromini | RR175512  | 13368899  | Malinak et al., 2018  | Genome | Malawi     | no      | 23.07    | Figbase 2017                                                                                                  |
| <i>Psilochromis subocularis</i>       | <i>Psilochromis subocularis</i>         | Napochromini | RR1802306 | 30707187  | Malinak et al., 2018  | Genome | Malawi     | yes     | 8.72     | Konings 2008                                                                                                  |
| <i>Atilapia sp. 'yellow'</i>          | NA                                      | Napochromini | RR175501  | 15270647  | Malinak et al., 2018  | Genome | Malawi     | no      | 26.13    | Figbase 2017, Alexandra Tyers                                                                                 |
| <i>Atilapia sp. 'blue chiboti'</i>    | NA                                      | Napochromini | RR175500  | 14218180  | Malinak et al., 2018  | Genome | Malawi     | no      | 24.72    | <a href="https://www.malawi.guru.de">https://www.malawi.guru.de</a>                                           |
| <i>Atilapia sp. 'orange'</i>          | NA                                      | Napochromini | RR175507  | 13832738  | Malinak et al., 2018  | Genome | Malawi     | no      | 12.10    | Konings 2008                                                                                                  |
| <i>Aulonocara sp. 'yellow'</i>        | NA                                      | Napochromini | RR175506  | 136822780 | Malinak et al., 2018  | Genome | Malawi     | no      | 22.54    | Figbase 2017                                                                                                  |
| <i>Diploleodon sp. 'zebra'</i>        | NA                                      | Napochromini | RR1749460 | 195800341 | Malinak et al., 2018  | Genome | Malawi     | no      | 34.23    | Konings 2008                                                                                                  |
| <i>Lethrinops sp. 'zebra'</i>         | NA                                      | Napochromini | RR299205  | 48911041  | Malinak et al., 2018  | Genome | Malawi     | no      | 8.31     | Konings 2008                                                                                                  |
| <i>Nimbochromis line</i>              | <i>Nimbochromis line</i>                | Napochromini | RR174657  | 32998117  | Malinak et al., 2018  | Genome | Malawi     | no      | 9.04     | Figbase 2017                                                                                                  |
| <i>Nimbochromis livingstoni</i>       | <i>Nimbochromis livingstoni</i>         | Napochromini | RR174654  | 48828029  | Malinak et al., 2018  | Genome | Malawi     | yes     | 74.05    | Credit: Jan Gerwin, Claudius Kratochwil, Sabine Urban                                                         |
| <i>Nimbochromis polyzona</i>          | <i>Nimbochromis polyzona</i>            | Napochromini | RR174658  | 4910404   | Malinak et al., 2018  | Genome | Malawi     | yes     | 8.46     | Figbase 2017                                                                                                  |
| <i>Nimbochromis aquarictus</i>        | <i>Nimbochromis aquarictus</i>          | Napochromini | RR1749536 | 39521754  | Malinak et al., 2018  | Genome | Malawi     | no      | 34.03    | <a href="https://www.researchgate.net/profile/Jan-Gerwin">https://www.researchgate.net/profile/Jan-Gerwin</a> |
| <i>Opaharynx brooksi</i>              | <i>Opaharynx brooksi</i>                | Napochromini | RR1826468 | 44645122  | Malinak et al., 2018  | Genome | Malawi     | yes     | 7.58     | Konings 2008                                                                                                  |
| <i>Opaharynx fibulatus</i>            | <i>Opaharynx fibulatus</i>              | Napochromini | RR1801382 | 115434314 | Malinak et al., 2018  | Genome | Malawi     | yes     | 19.53    | Konings 2008, Credit: Jan Gerwin, Claudius Kratochwil, Sabine Urban                                           |
| <i>Opaharynx speciosus</i>            | <i>Opaharynx speciosus</i>              | Napochromini | RR175488  | 13818756  | Malinak et al., 2018  | Genome | Malawi     | no      | 23.87    | Figbase 2017                                                                                                  |
| <i>Opaharynx tetrastrigata</i>        | <i>Opaharynx tetrastrigata</i>          | Napochromini | RR175480  | 53353662  | Malinak et al., 2018  | Genome | Malawi     | no      | 9.10     | igsnat.at                                                                                                     |
| <i>Paridichromis lokohohi</i>         | <i>Paridichromis lokohohi</i>           | Napochromini | RR1801381 | 13207735  | Malinak et al., 2018  | Genome | Malawi     | no      | 23.10    | Konings 2008                                                                                                  |
| <i>Phenacogaster genivittata</i>      | <i>Phenacogaster genivittata</i>        | Napochromini | RR1749403 | 24417746  | Malinak et al., 2018  | Genome | Malawi     | no      | 40.08    | <a href="https://fishbase.org">https://fishbase.org</a>                                                       |
| <i>Phenacogaster salicarpes</i>       | <i>Phenacogaster salicarpes</i>         | Napochromini | RR174977  | 21376796  | Malinak et al., 2018  | Genome | Malawi     | no      | 36.38    | Figbase 2017                                                                                                  |
| <i>Psilochromis electra</i>           | <i>Psilochromis electra</i>             | Napochromini | RR174653  | 92489297  | Malinak et al., 2018  | Genome | Malawi     | no      | 8.54     | Konings 2008, Credit: Jan Gerwin, Claudius Kratochwil, Sabine Urban                                           |
| <i>Psilochromis jacksoni</i>          | <i>Psilochromis jacksoni</i>            | Napochromini | RR174656  | 11818758  | Malinak et al., 2018  | Genome | Malawi     | yes     | 8.84     | Konings 2008, Credit: Jan Gerwin, Claudius Kratochwil, Sabine Urban                                           |
| <i>Psilochromis longimanus</i>        | <i>Psilochromis longimanus</i>          | Napochromini | RR175524  | 127145445 | Malinak et al., 2018  | Genome | Malawi     | no      | 21.88    | Konings 2008                                                                                                  |
| <i>Psilochromis melano</i>            | <i>Psilochromis melano</i>              | Napochromini | RR174652  | 70336649  | Malinak et al., 2018  | Genome | Malawi     | no      | 11.92    | Figbase 2017                                                                                                  |
| <i>Psilochromis vulgaris</i>          | <i>Psilochromis vulgaris</i>            | Napochromini | RR1826495 | 44905487  | Malinak et al., 2018  | Genome | Malawi     | no      | 3.77     | Konings 2008                                                                                                  |
| <i>Phromis eritrea</i>                | <i>Phromis eritrea</i>                  | Napochromini | RR174976  | 34215691  | Malinak et al., 2018  | Genome | Malawi     | no      | 41.53    | Figbase 2017                                                                                                  |
| <i>Phromis eritrea</i>                | <i>Phromis eritrea</i>                  | Napochromini | RR1749423 | 25612740  | Malinak et al., 2018  | Genome | Malawi     | yes     | 37.11    | <a href="https://www.malawi.guru.de">https://www.malawi.guru.de</a>                                           |
| <i>Phenacochromis galpateri</i>       | <i>Phenacochromis galpateri</i>         | Napochromini | RR175514  | 14137439  | Malinak et al., 2018  | Genome | Malawi     | yes     | 24.52    | Michael K. Oliver 2012                                                                                        |
| <i>Maylandia livingstoni</i>          | <i>Psudotropheus livingstoni</i>        | Napochromini | RR1749538 | 341865747 | Malinak et al., 2018  | Genome | Malawi     | yes     | 41.46    | Figbase 2017, Credit: Jan Gerwin, Claudius Kratochwil, Sabine Urban                                           |
| <i>Rhamphochromis esox</i>            | <i>Rhamphochromis esox</i>              | Napochromini | RR1801383 | 116902020 | Malinak et al., 2018  | Genome | Malawi</   |         |          |                                                                                                               |

| Species                               | Current status [Eschmeyer 2020] | Tribus       | Accession  | raw reads | Source              | Type              | Lake       | Stripes | Coverage | Picture Reference                                                                                                                                                                           |
|---------------------------------------|---------------------------------|--------------|------------|-----------|---------------------|-------------------|------------|---------|----------|---------------------------------------------------------------------------------------------------------------------------------------------------------------------------------------------|
| Orthochromis sp. 'redhead'            | NA                              | orthochromis | RR288830   | 12962341  | McGee et al., 2016  | Genome            | Victoria   | yes     | 21.90    | McGee et al., 2016                                                                                                                                                                          |
| Serranochromis sp. 'cheekbeard'       | NA                              | haplochromis | RR288829   | 90496280  | McGee et al., 2016  | Genome            | Victoria   | yes     | 37.67    | McGee et al., 2016                                                                                                                                                                          |
| Pundamilia nyreni                     | Pundamilia nyreni               | haplochromis | RR410921   | 11476335  | Meier et al., 2017a | Genome            | Victoria   | no      | 24.49    | Credit: Jan Gerwin, Claudius Kratochwi, Sabine Urban                                                                                                                                        |
| Pundamilia nyreni 'hybrid'            | Pundamilia nyreni               | haplochromis | RR410920   | 11230241  | Meier et al., 2017a | Genome            | Victoria   | no      | 36.47    | Credit: Jan Gerwin, Claudius Kratochwi, Sabine Urban                                                                                                                                        |
| Pundamilia pundamilia                 | Pundamilia pundamilia           | haplochromis | RR410918   | 11230207  | Meier et al., 2017a | Genome            | Victoria   | no      | 25.53    | Credit: Jan Gerwin, Claudius Kratochwi, Sabine Urban                                                                                                                                        |
| Pundamilia pundamilia 'hybrid'        | Pundamilia pundamilia           | haplochromis | RR410919   | 14304941  | Meier et al., 2017a | Genome            | Victoria   | no      | 24.24    | Credit: Jan Gerwin, Claudius Kratochwi, Sabine Urban                                                                                                                                        |
| Astatotilapia stappersi               | Astatotilapia stappersi         | haplochromis | RR5099812  | 81707045  | Meier et al., 2017b | Genome            | Riverine   | yes     | 13.82    | Fishbase 2017                                                                                                                                                                               |
| Haplochromis gracilis                 | Haplochromis gracilis           | haplochromis | RR5099858  | 126887230 | Meier et al., 2017b | Genome            | Kivu       | no      | 21.57    | Snoeks et al., 2012                                                                                                                                                                         |
| Haplochromis pharyngalis              | Haplochromis pharyngalis        | haplochromis | RR5099819  | 122386791 | Meier et al., 2017b | Genome            | Victoria   | no      | 20.76    | Fishbase 2017, <a href="http://www.african-ichthyol.com/Phytophagus.htm">http://www.african-ichthyol.com/Phytophagus.htm</a>                                                                |
| Astatotilapia stappersi               | Astatotilapia stappersi         | haplochromis | RR5041288  | 13940947  | NA                  | Genome            | Riverine   | yes     | 23.96    | Fishbase 2017                                                                                                                                                                               |
| Astatotilapia cillifera               | Astatotilapia cillifera         | haplochromis | RR5041217  | 13070203  | NA                  | Genome            | Riverine   | yes     | 22.40    | Fishbase 2017                                                                                                                                                                               |
| Haplochromis latifasciatus            | Haplochromis latifasciatus      | haplochromis | RR5221256  | 45779473  | NA                  | Genome            | Victoria   | no      | 67.41    | Fishbase 2017, Credit: Jan Gerwin, Claudius Kratochwi, Sabine Urban                                                                                                                         |
| Albattrochromis labrusus              | Albattrochromis labrusus        | haplochromis | This study | 884717    | RR12394590          | Target enrichment | Malawi     | yes     | 56.53    | Schram 1998, Credit: Jan Gerwin, Claudius Kratochwi, Sabine Urban                                                                                                                           |
| Alticampogon calvus                   | Alticampogon calvus             | haplochromis | This study | 2465437   | RR12394620          | Target enrichment | Tanganyika | no      | 163.27   | Credit: Jan Gerwin, Claudius Kratochwi, Sabine Urban                                                                                                                                        |
| Neolampogon fasciatus                 | Alticampogon fasciatus          | lamplogrines | This study | 582161    | RR12394606          | Target enrichment | Tanganyika | no      | 42.62    | Credit: Jan Gerwin, Claudius Kratochwi, Sabine Urban                                                                                                                                        |
| Aristochromis chitrayi                | Aristochromis chitrayi          | haplochromis | This study | 761951    | RR12394570          | Target enrichment | Malawi     | no      | 60.21    | Fishbase 2017, Credit: Jan Gerwin, Claudius Kratochwi, Sabine Urban                                                                                                                         |
| Astatochromis aluani                  | Astatochromis aluani            | haplochromis | This study | 2211308   | RR12394560          | Target enrichment | Victoria   | no      | 177.60   | Fishbase 2017                                                                                                                                                                               |
| Astatotilapia burtoni                 | Astatotilapia burtoni           | haplochromis | This study | 1331498   | RR12394551          | Target enrichment | Tanganyika | yes     | 97.98    | Genet et al., 2005                                                                                                                                                                          |
| Astatotilapia cillifera               | Astatotilapia cillifera         | haplochromis | This study | 2037717   | RR12394612          | Target enrichment | Malawi     | no      | 197.66   | Fishbase 2017                                                                                                                                                                               |
| Astatotilapia stappersi               | Astatotilapia stappersi         | haplochromis | This study | 1940513   | RR12394542          | Target enrichment | Riverine   | yes     | 126.97   | Fishbase 2017                                                                                                                                                                               |
| Aulonocara jacobeborgi                | Aulonocara jacobeborgi          | haplochromis | This study | 1748491   | RR12394584          | Target enrichment | Malawi     | yes     | 124.83   | Schram 2005                                                                                                                                                                                 |
| Bufochromis rotundus                  | Bufochromis rotundus            | haplochromis | This study | 356220    | RR12394611          | Target enrichment | Malawi     | no      | 47.57    | Fishbase 2017, Credit: Jan Gerwin, Claudius Kratochwi, Sabine Urban                                                                                                                         |
| Cheilochromis eucilus                 | Cheilochromis eucilus           | haplochromis | This study | 206900    | RR12394600          | Target enrichment | Malawi     | yes     | 157.15   | Fishbase 2017, Credit: Jan Gerwin, Claudius Kratochwi, Sabine Urban                                                                                                                         |
| Chilotilapia rhodesi                  | Chilotilapia rhodesi            | haplochromis | This study | 1920819   | RR12394608          | Target enrichment | Malawi     | yes     | 104.41   | Credit: Jan Gerwin, Claudius Kratochwi, Sabine Urban                                                                                                                                        |
| Chirotopia demasoni                   | Chirotopia demasoni             | haplochromis | This study | 41539235  | RR12394616          | Genome            | Malawi     | no      | 73.43    | Fishbase 2017, <a href="https://doi.org/10.1093/iob/obz017">https://doi.org/10.1093/iob/obz017</a>                                                                                          |
| Chirotopia demasoni                   | Chirotopia demasoni             | haplochromis | This study | 1203084   | RR12394601          | Target enrichment | Malawi     | no      | 82.60    | Fishbase 2017, <a href="http://www.african-ichthyol.com/Phytophagus.htm">http://www.african-ichthyol.com/Phytophagus.htm</a>                                                                |
| Pseudotropheus flavus                 | Pseudotropheus flavus           | haplochromis | This study | 1127964   | RR12394539          | Target enrichment | Malawi     | no      | 90.64    | Van Steenbergen et al., 2015                                                                                                                                                                |
| Copadichromis borleyi                 | Copadichromis borleyi           | haplochromis | This study | 58932529  | RR12394628          | Genome            | Malawi     | no      | 101.25   | Fishbase 2017, Koenig 2008, Credit: Jan Gerwin, Claudius Kratochwi, Sabine Urban                                                                                                            |
| Copadichromis borleyi                 | Copadichromis borleyi           | haplochromis | This study | 767736    | RR12394607          | Target enrichment | Malawi     | no      | 52.16    | Fishbase 2017, Koenig 2008, Credit: Jan Gerwin, Claudius Kratochwi, Sabine Urban                                                                                                            |
| Cyathochromis obliquidens             | Cyathochromis obliquidens       | haplochromis | This study | 1128172   | RR12394604          | Target enrichment | Malawi     | yes     | 113.60   | Fishbase 2017                                                                                                                                                                               |
| Cynotilapia aha                       | Cynotilapia aha                 | haplochromis | This study | 2173869   | RR12394603          | Target enrichment | Malawi     | no      | 178.97   | Fishbase 2017, Credit: Jan Gerwin, Claudius Kratochwi, Sabine Urban                                                                                                                         |
| Cyprichromis leptostoma               | Cyprichromis leptostoma         | agynochromis | This study | 889004    | RR12394621          | Target enrichment | Tanganyika | no      | 142.56   | Fishbase 2017                                                                                                                                                                               |
| Cyrtocara moorii                      | Cyrtocara moorii                | haplochromis | This study | 1405048   | RR12394610          | Target enrichment | Malawi     | no      | 124.08   | Fishbase 2017, Credit: Jan Gerwin, Claudius Kratochwi, Sabine Urban                                                                                                                         |
| Diodonichromis operosirostris         | Diodonichromis operosirostris   | haplochromis | This study | 710250    | RR12394605          | Target enrichment | Malawi     | no      | 155.88   | Fishbase 2017, Credit: Jan Gerwin, Claudius Kratochwi, Sabine Urban                                                                                                                         |
| Diodonichromis strigatus              | Diodonichromis strigatus        | haplochromis | This study | 1599911   | RR12394600          | Target enrichment | Malawi     | yes     | 126.36   | Fishbase 2017, Credit: Jan Gerwin, Claudius Kratochwi, Sabine Urban                                                                                                                         |
| Eretmodus markshetti                  | Eretmodus markshetti            | eretmodi     | This study | 2277447   | RR12394598          | Target enrichment | Tanganyika | no      | 172.80   | Fishbase 2017, Credit: Jan Gerwin, Claudius Kratochwi, Sabine Urban                                                                                                                         |
| Esochromis anagensis                  | Esochromis anagensis            | haplochromis | This study | 1327193   | RR12394597          | Target enrichment | Malawi     | no      | 107.50   | Fishbase 2017, Credit: Jan Gerwin, Claudius Kratochwi, Sabine Urban                                                                                                                         |
| Fossochromis rotundus                 | Fossochromis rotundus           | haplochromis | This study | 2862726   | RR12394596          | Target enrichment | Malawi     | yes     | 191.23   | Fishbase 2017                                                                                                                                                                               |
| Gynochromis mento                     | Gynochromis mento               | haplochromis | This study | 1226313   | RR12394595          | Target enrichment | Malawi     | no      | 14.71    | Koenig 2008                                                                                                                                                                                 |
| Haplochromis aeneolator               | Haplochromis aeneolator         | haplochromis | This study | 1746417   | RR12394614          | Target enrichment | Victoria   | yes     | 172.02   | Fishbase 2017, Credit: Jan Gerwin, Claudius Kratochwi, Sabine Urban                                                                                                                         |
| Haplochromis ciliatus                 | Haplochromis ciliatus           | haplochromis | This study | 1426594   | RR12394602          | Target enrichment | Victoria   | yes     | 64.82    | Credit: Jan Gerwin, Claudius Kratochwi, Sabine Urban                                                                                                                                        |
| Haplochromis schwanzi                 | Haplochromis schwanzi           | haplochromis | This study | 13268732  | RR12394563          | Genome            | Victoria   | no      | 22.93    | <a href="http://www.african-ichthyol.com/Phytophagus.htm">http://www.african-ichthyol.com/Phytophagus.htm</a>                                                                               |
| Haplochromis melanotus                | Haplochromis melanotus          | haplochromis | This study | 182705    | RR12394592          | Target enrichment | Victoria   | no      | 127.36   | Fishbase 2017, Credit: Jan Gerwin, Claudius Kratochwi, Sabine Urban                                                                                                                         |
| Haplochromis paropus                  | Haplochromis paropus            | haplochromis | This study | 2422015   | RR12394593          | Target enrichment | Victoria   | no      | 41.45    | McGee et al., 2016, Snoeks et al., 2012                                                                                                                                                     |
| Haplochromis paropus                  | Haplochromis paropus            | haplochromis | This study | 30177843  | RR12394624          | Genome            | Victoria   | yes     | 51.77    | McGee et al., 2016, Snoeks et al., 2012                                                                                                                                                     |
| Haplochromis phytophagus              | Haplochromis phytophagus        | haplochromis | This study | 1251520   | RR12394617          | Target enrichment | Victoria   | no      | 75.72    | Fishbase 2017, <a href="http://www.african-ichthyol.com/Phytophagus.htm">http://www.african-ichthyol.com/Phytophagus.htm</a>                                                                |
| Haplochromis phytophagus striped      | Haplochromis phytophagus        | haplochromis | This study | 602076    | RR12394613          | Target enrichment | Victoria   | yes     | 73.38    | Fishbase 2017, <a href="http://www.african-ichthyol.com/Phytophagus.htm">http://www.african-ichthyol.com/Phytophagus.htm</a>                                                                |
| Haplochromis discifid                 | Haplochromis discifid           | haplochromis | This study | 4926884   | RR12394618          | Genome            | Victoria   | no      | 64.82    | Credit: Jan Gerwin, Claudius Kratochwi, Sabine Urban                                                                                                                                        |
| Haplochromis cavaletti                | Haplochromis cavaletti          | haplochromis | This study | 1865524   | RR12394589          | Target enrichment | Victoria   | no      | 102.92   | Credit: Jan Gerwin, Claudius Kratochwi, Sabine Urban                                                                                                                                        |
| Haplochromis serranus                 | Haplochromis serranus           | haplochromis | This study | 153595    | RR12394622          | Target enrichment | Victoria   | no      | 17.79    | Schädel et al., 2010, <a href="https://www.researchgate.net/publication/204474680_haplochromis_cavaletti">https://www.researchgate.net/publication/204474680_haplochromis_cavaletti</a>     |
| Haplochromis serranus                 | Haplochromis serranus           | haplochromis | This study | 12618305  | RR12394587          | Genome            | Victoria   | yes     | 21.39    | Schädel et al., 2010, <a href="https://www.aquariophila.com/files/glossar/2044-haplochromis_cavaletti.html">https://www.aquariophila.com/files/glossar/2044-haplochromis_cavaletti.html</a> |
| Haplochromis therapsion               | Haplochromis therapsion         | haplochromis | This study | 1613840   | RR12394586          | Target enrichment | Victoria   | yes     | 21.89    | McGee et al., 2016, Snoeks et al., 2012                                                                                                                                                     |
| Haplochromis therapsion               | Haplochromis therapsion         | haplochromis | This study | 155840279 | RR12394552          | Genome            | Victoria   | yes     | 26.47    | McGee et al., 2016, Snoeks et al., 2012                                                                                                                                                     |
| Haplochromis ventralis                | Haplochromis ventralis          | haplochromis | This study | 8953691   | RR12394585          | Target enrichment | Victoria   | yes     | 47.87    | <a href="https://www.aquarium.org/articles/haplo-and-or-fasciatus/">https://www.aquarium.org/articles/haplo-and-or-fasciatus/</a>                                                           |
| Haplochromis discifid                 | Haplochromis discifid           | lamplogrines | This study | 164472    | RR12394582          | Target enrichment | Tanganyika | yes     | 124.62   | Fishbase 2017                                                                                                                                                                               |
| Jaliscochromis marulii                | Jaliscochromis marulii          | haplochromis | This study | 1429614   | RR12394590          | Target enrichment | Victoria   | yes     | 56.80    | Fishbase 2017                                                                                                                                                                               |
| Jaliscochromis ornatus                | Jaliscochromis ornatus          | lamplogrines | This study | 745125    | RR12394581          | Target enrichment | Tanganyika | yes     | 309.43   | Fishbase 2017                                                                                                                                                                               |
| Jaliscochromis ornatus                | Jaliscochromis ornatus          | lamplogrines | This study | 523564    | RR12394579          | Target enrichment | Tanganyika | yes     | 37.76    | Fishbase 2017                                                                                                                                                                               |
| Libiodorophus burtoni                 | Libiodorophus burtoni           | haplochromis | This study | 1395219   | RR12394578          | Target enrichment | Malawi     | yes     | 106.76   | Fishbase 2017                                                                                                                                                                               |
| Libiodorophus caeruleus               | Libiodorophus caeruleus         | haplochromis | This study | 674482    | RR12394577          | Target enrichment | Malawi     | no      | 37.02    | Fishbase 2017                                                                                                                                                                               |
| Neolampogon multifasciatus            | Neolampogon multifasciatus      | lamplogrines | This study | 702870    | RR12394557          | Target enrichment | Tanganyika | no      | 48.76    | Credit: Jan Gerwin, Claudius Kratochwi, Sabine Urban                                                                                                                                        |
| Lampogon melalepis                    | Lampogon melalepis              | lamplogrines | This study | 159713    | RR12394576          | Target enrichment | Tanganyika | yes     | 80.80    | Fishbase 2017, Credit: Jan Gerwin, Claudius Kratochwi, Sabine Urban                                                                                                                         |
| Lampogon melalepis                    | Lampogon melalepis              | lamplogrines | This study | 181716    | RR12394575          | Target enrichment | Tanganyika | yes     | 64.22    | Credit: Jan Gerwin, Claudius Kratochwi, Sabine Urban                                                                                                                                        |
| Lampogon melalepis                    | Lampogon melalepis              | lamplogrines | This study | 122067    | RR12394573          | Target enrichment | Victoria   | no      | 81.62    | Credit: Jan Gerwin, Claudius Kratochwi, Sabine Urban                                                                                                                                        |
| Pseudotropheus lombardoi              | Pseudotropheus lombardoi        | haplochromis | This study | 1502827   | RR12394538          | Target enrichment | Malawi     | no      | 106.06   | Fishbase 2017                                                                                                                                                                               |
| Maylandia zebra                       | Maylandia zebra                 | haplochromis | This study | 14474189  | RR12394625          | Genome            | Malawi     | no      | 24.82    | Credit: Jan Gerwin, Claudius Kratochwi, Sabine Urban                                                                                                                                        |
| Melanochromis auratus                 | Melanochromis auratus           | haplochromis | This study | 39716700  | RR12394572          | Genome            | Malawi     | yes     | 68.21    | Credit: Jan Gerwin, Claudius Kratochwi, Sabine Urban                                                                                                                                        |
| Melanochromis auratus                 | Melanochromis auratus           | haplochromis | This study | 1361355   | RR12394571          | Target enrichment | Malawi     | yes     | 74.48    | Credit: Jan Gerwin, Claudius Kratochwi, Sabine Urban                                                                                                                                        |
| Melanochromis kaskazi                 | Melanochromis kaskazi           | haplochromis | This study | 8897367   | RR12394567          | Target enrichment | Malawi     | yes     | 248.31   | Credit: Jan Gerwin, Claudius Kratochwi, Sabine Urban                                                                                                                                        |
| Mylodonichromis lateralis             | Mylodonichromis lateralis       | haplochromis | This study | 13368899  | RR12394566          | Target enrichment | Malawi     | no      | 70.05    | Fishbase 2017                                                                                                                                                                               |
| Mylodonichromis lateralis             | Mylodonichromis lateralis       | haplochromis | This study | 14059405  | RR12394565          | Target enrichment | Malawi     | no      | 69.64    | Credit: Jan Gerwin, Claudius Kratochwi, Sabine Urban                                                                                                                                        |
| Mylodonichromis lateralis             | Mylodonichromis lateralis       | haplochromis | This study | 3114829   | RR12394565          | Target enrichment | Malawi     | no      | 69.25    | Credit: Jan Gerwin, Claudius Kratochwi, Sabine Urban                                                                                                                                        |
| Haplochromis sp. 'orange rock hutter' | NA                              | haplochromis | This study | 274338    | RR12394615          | Target enrichment | Victoria   | yes     | 22.39    | Fishbase 2017                                                                                                                                                                               |
| Haplochromis sp. 'orange rock hutter' | NA                              | haplochromis | This study | 155487703 | RR12394627          | Genome            | Victoria   | yes     | 26.04    | Fishbase 2017                                                                                                                                                                               |
| Nevochromis chrysopterus              | Nevochromis chrysopterus        | haplochromis | This study | 1235951   | RR12394564          | Target enrichment | Malawi     | no      | 100.99   | Fishbase 2017, Credit: Jan Gerwin, Claudius Kratochwi, Sabine Urban                                                                                                                         |
| Neolampogon buscheri 'Kachochi'       | Neolampogon buscheri            | lamplogrines | This study | 4126192   | RR12394562          | Target enrichment | Tanganyika | yes     | 292.51   | Credit: Jan Gerwin, Claudius Kratochwi, Sabine Urban                                                                                                                                        |
| Neolampogon buscheri 'Kamekond'       | Neolampogon buscheri            | lamplogrines | This study | 4891487   | RR12394630          | Target enrichment | Tanganyika | no      | 266.46   | Credit: Jan Gerwin, Claudius Kratochwi, Sabine Urban                                                                                                                                        |
| Neolampogon caudopunctatus            | Neolampogon caudopunctatus      | lamplogrines | This study | 1350642   | RR12394629          | Target enrichment | Tanganyika | no      | 84.22    | Credit: Jan Gerwin, Claudius Kratochwi, Sabine Urban                                                                                                                                        |
| Neolampogon longicaudatus             | Neolampogon longicaudatus       | lamplogrines | This study | 2012178   | RR12394574          | Target enrichment | Tanganyika | yes     | 213.18   | Posso et al., 2017, Credit: Jan Gerwin, Claudius Kratochwi, Sabine Urban                                                                                                                    |
| Neolampogon prochilus                 | Neolampogon prochilus           | lamplogrines | This study | 1203936   | RR12394556          | Target enrichment | Tanganyika | no      | 80.31    | Credit: Jan Gerwin, Claudius Kratochwi, Sabine Urban                                                                                                                                        |
| Neolampogon dufrenoyi                 | Neolampogon palmeri (synonym)   | lamplogrines | This study | 1341787   | RR12394559          | Target enrichment | Tanganyika | no      | 233.11   | Credit: Jan Gerwin, Claudius Kratochwi, Sabine Urban                                                                                                                                        |
| Neolampogon similis                   | Neolampogon similis             | lamplogrines | This study | 90449     | RR12394575          | Target enrichment | Tanganyika | no      | 68.64    | Posso et al., 2017, Credit: Jan Gerwin, Claudius Kratochwi, Sabine Urban                                                                                                                    |
| Neobufochromis livingstoni            | Neobufochromis livingstoni      | haplochromis | This study | 1356184   | RR12394563          | Target enrichment | Malawi     | yes     | 95.98    | Credit: Jan Gerwin, Claudius Kratochwi, Sabine Urban                                                                                                                                        |
| Nyasachromis probata                  | Nyasachromis probata            | haplochromis | This study | 253055    | RR12394555          | Target enrichment | Malawi     | yes     | 173.64   | Credit: Jan Gerwin, Claudius Kratochwi, Sabine Urban                                                                                                                                        |
| Ophthalmotilapia ventralis            | Ophthalmotilapia ventralis      | actinidi     | This study | 1299528   | RR12394554          | Target enrichment | Tanganyika | no      | 131.10   | Credit: Jan Gerwin, Claudius Kratochwi, Sabine Urban                                                                                                                                        |
| Oreochromis variabilis                | Oreochromis variabilis          | eretmodi     | This study | 2026813   | RR12394553          | Target enrichment | Victoria   | no      | 123.66   | Fishbase 2017, <a href="http://www.fishbase.org/species/Oreochromis/Oreochromis_variabilis.html">http://www.fishbase.org/species/Oreochromis/Oreochromis_variabilis.html</a>                |
| Stiphodon tibetanus                   | Stiphodon tibetanus             | haplochromis | This study | 151453    | RR12394550          | Target enrichment | Malawi     | no      | 111.11   | Koenig 2008, Credit: Jan Gerwin, Claudius Kratochwi, Sabine Urban                                                                                                                           |
| Pterotilapia nigra                    | Pterotilapia nigra              | haplochromis | This study | 280662    | RR12394549          | Target enrichment | Malawi     | yes     | 202.56   | Fishbase 2017</                                                                                                                                                                             |

**Table S2. Summary of the predicted TFBSs for highly associated variants within region LM (90 bp) and overlapping regions LV 1 / LVRS. For LM we compared the non-striped *Pseudotropheus demasoni* (Pdem) with a sequence of the striped *Pseudotropheus cyaneorhabdos* (Pcya) and calculated ‘Delta relative score’ as: relative score Pdem - relative score Pcya. For LV, we compared the non-striped *Pundamilia nyererei* (Pnye) with a sequence of the striped *Haplochromis sauvagei* (Hsau). Information about location of gene expression was collected from ZFIN (<https://zfin.org/>).**

| Rel. Pos./<br>Pos. Scaffold | Matrix ID   | Name         | Score Pnye    | Score Hsau | Relative score Pnye | Relative score Hsau | TF binding site Pnye | TF binding site Hsau | Delta relative score | Expressed in                                                         |                                                                     |
|-----------------------------|-------------|--------------|---------------|------------|---------------------|---------------------|----------------------|----------------------|----------------------|----------------------------------------------------------------------|---------------------------------------------------------------------|
| 1/441,862                   | MA0632.1    | Tcf5         | 5.24906       | -0.786154  | 0.850999305         | 0.659851397         | acctcGggaa           | acctcGggaa           | 0.19                 | NA                                                                   |                                                                     |
|                             | MA0632.1    | Tcf5         | 5.24906       | -0.786154  | 0.850999305         | 0.659851397         | tccGgaggt            | tccGgaggt            | 0.19                 | NA                                                                   |                                                                     |
|                             | MA0808.1    | SP1          | 7.27214       | 5.63166    | 0.95872444          | 0.87078494          | Gggaac               | Tggaac               | 0.09                 | mesoderm, kidney, liver, yolk, brain, whole organism                 |                                                                     |
|                             | MA0510.1    | RFK5         | 9.41323       | 2.37858    | 0.881501523         | 0.801297159         | aacctcGgaaacgc       | aacctcGgaaacgc       | 0.08                 | MHC class II deficiency in humans                                    |                                                                     |
|                             | MA0081.1    | SPB          | 7.21747       | 5.99508    | 0.888895152         | 0.847133219         | tcGgaa               | tcTggaa              | 0.04                 | NA                                                                   |                                                                     |
|                             | MA0098.1    | ETS1         | 4.12173       | 4.64436    | 0.830462283         | 0.854569672         | gttccC               | gttccA               | -0.02                | mesoderm, neural crest, somite, whole organism                       |                                                                     |
|                             | MA0152.1    | NFATc2       | 6.42094       | 8.59374    | 0.817847408         | 0.897985281         | gtttccC              | gtttccA              | -0.08                | nuclear factor of activated T cells                                  |                                                                     |
|                             | MA0671.1    | NFIX         | 1.5192        | 5.3713     | 0.781271681         | 0.871959945         | gtttccGga            | gtttccAga            | -0.09                | central nervous system, muscle, mesoderm, somite, whole organism     |                                                                     |
|                             | MA1649.1    | ZBTB12       | 8.45914       | 12.8165    | 0.863030553         | 0.964682273         | ctcGgaaacag          | ctcTgaaacag          | -0.10                | zinc finger and BTB domain containing 12                             |                                                                     |
|                             | MA0698.1    | ZBTB18       | 2.05887       | 10.6473    | 0.77582113          | 0.888706636         | gttccGaggttc         | gttccAgaggttc        | -0.11                | cerebellum, telencephalon, hypothalamus                              |                                                                     |
|                             | MA1579.1    | ZBTB26       | 4.09234       | 9.92644    | 0.755622864         | 0.87511298          | gtttccGaggttc        | gtttccAgaggttc       | -0.12                | NA                                                                   |                                                                     |
|                             | MA1123.1    | TWIST1       | 1.86835       | 9.14518    | 0.723876747         | 0.86691666          | gttccGaggttc         | gttccAgaggttc        | -0.14                | whole organism, neural crest, brain, gut, mesoderm, somite           |                                                                     |
|                             | MA1123.2    | TWIST1       | 1.80727       | 9.04444    | 0.719854705         | 0.8631341           | gttccGaggttc         | gttccAgaggttc        | -0.14                | whole organism, neural crest, brain, gut, mesoderm, somite           |                                                                     |
|                             | MA0161.1    | NFIC         | 1.94788       | 6.28526    | 0.74040017          | 0.885714517         | cGgaa                | cTgaa                | -0.15                | NA, nuclear factor I/C                                               |                                                                     |
|                             | Matrix ID   | Name         | Score Pnye    | Score Hsau | Relative score Pnye | Relative score Hsau | TF binding site Pnye | TF binding site Hsau | Delta relative score | Expressed in                                                         |                                                                     |
|                             | 165/442,026 | MA0877.2     | BARHL1        | 5.02834    | -2.94698            | 0.864909215         | 0.684156116          | ttaAacta             | ttaGacta             | 0.18                                                                 | dienecephalon, hindbrain, retina, hypothalamus, brain               |
| MA1536.1                    |             | NR2C2(var.2) | 5.03433       | -3.96446   | 0.905144825         | 0.74080759          | tagtTtaa             | tagtCtaa             | 0.16                 | brain, retina, telencephalon                                         |                                                                     |
| MA0635.1                    |             | BARHL2       | 7.38866       | -1.33995   | 0.904134859         | 0.74164983          | ttaAactat            | ttaGactat            | 0.16                 | midbrain, hindbrain, retina, telencephalon                           |                                                                     |
| MA0619.1                    |             | LUN54        | 10.2876       | 3.29444    | 0.941586937         | 0.802931715         | gtttAaact            | gtttAaact            | 0.14                 | whole organism                                                       |                                                                     |
| MA0619.1                    |             | LUN54        | 9.77514       | 2.78201    | 0.931426667         | 0.792771454         | gtTaaaca             | gtCaaaca             | 0.14                 | whole organism                                                       |                                                                     |
| MA1534.1                    |             | NR1J3        | 8.67247       | 1.75317    | 0.909018439         | 0.801168336         | ttaAactat            | ttaGactat            | 0.11                 | constitutive androstane receptor                                     |                                                                     |
| MA0033.1                    |             | FOXl1        | 5.88864       | 4.08095    | 0.871907443         | 0.789979077         | aAactata             | aGactata             | 0.08                 | brain, lateral mesoderm, whole organism                              |                                                                     |
| MA0033.2                    |             | FOXl1        | 8.17045       | 5.80854    | 0.924997273         | 0.881744068         | Taaaca               | Caaaca               | 0.04                 | brain, lateral mesoderm, whole organism                              |                                                                     |
| MA0481.3                    |             | FOXP1        | 8.75677       | 7.80292    | 0.871394914         | 0.850178005         | gtTaaacatc           | gtCaaacatc           | 0.02                 | central nervous system, gut, heart, retina, whole organism           |                                                                     |
| MA0148.4                    |             | FOXA1        | 10.3587       | 9.3637     | 0.878605463         | 0.859225739         | gtTaaacatc           | gtCaaacatc           | 0.02                 | endoderm, digestive system, nervous system, liver, gut               |                                                                     |
| MA1683.1                    |             | FOXA3        | 9.49954       | 8.69625    | 0.884327905         | 0.865917483         | gtTaaacatc           | gtCaaacatc           | 0.02                 | digestive system, endoderm, ectoderm, liver, pancreas                |                                                                     |
| MA0845.1                    |             | FOXB1        | 8.22952       | 7.28203    | 0.853762209         | 0.83884597          | agtTaaacatc          | agtCaaacatc          | 0.01                 | central nervous system, neural plate, rhombomere, whole organism     |                                                                     |
| MA0047.3                    |             | FOXA2        | 7.9584        | 7.47513    | 0.854893183         | 0.845252648         | gtTaaacatc           | gtCaaacatc           | 0.01                 | brain, endoderm, floor plate, gut, mesoderm, pharynx, whole organism |                                                                     |
| MA1103.2                    |             | FOXK2        | 8.76522       | 8.44889    | 0.86485895          | 0.857375429         | gtTaaacatc           | gtCaaacatc           | 0.01                 | NA                                                                   |                                                                     |
| MA1103.1                    |             | FOXK2        | 9.16382       | 9.10247    | 0.876385881         | 0.875050714         | gtTaaacatc           | gtCaaacatc           | 0.00                 | NA                                                                   |                                                                     |
| MA0031.1                    |             | FOXD1        | 9.41226       | 9.41226    | 0.895821579         | 0.895821579         | Taaacat              | Caaacat              | 0.00                 | neural crest, dienecephalon, forebrain, eye                          |                                                                     |
| MA0613.1                    |             | FOXL1        | 7.32076       | 7.32076    | 0.872632578         | 0.872632578         | Taaacat              | Caaacat              | 0.00                 | brain, immature eye, telencephalon                                   |                                                                     |
| MA0157.2                    |             | FOXO3        | 7.4599        | 7.4599     | 0.857472117         | 0.857472117         | Taaacat              | Caaacat              | 0.00                 | brain, eye, head, whole organism                                     |                                                                     |
| MA0849.1                    |             | FOXO6        | 4.91252       | 4.91252    | 0.857142856         | 0.857142856         | Taaaca               | Caaaca               | 0.00                 | brain, central nervous system, eye, whole organism                   |                                                                     |
| MA0850.1                    |             | FOXP3        | 6.14419       | 6.14419    | 0.870272076         | 0.870272076         | Taaaca               | Caaaca               | 0.00                 | gill, gut, kidney, liver, spleen, whole organism                     |                                                                     |
| MA1606.1                    |             | Foxf1        | 9.57814       | 9.61685    | 0.888419647         | 0.889237138         | gtTaaacatc           | gtCaaacatc           | 0.00                 | swim bladder, neurocranium, gut, pharyngeal arch                     |                                                                     |
| MA0635.1                    |             | BARHL2       | 5.81157       | 5.95352    | 0.874776918         | 0.877419475         | tTaaacatc            | tCaaacatc            | 0.00                 | midbrain, hindbrain, retina, telencephalon                           |                                                                     |
| MA0847.1                    |             | FOXD2        | 6.70681       | 7.34233    | 0.895252836         | 0.908750013         | Taaaca               | Caaaca               | -0.01                | dienecephalon, pharyngeal arch, mesoderm                             |                                                                     |
| MA0848.1                    |             | FOXD4        | 4.6006        | 5.33769    | 0.839607272         | 0.854179421         | Taaaca               | Caaaca               | -0.01                | brain, endoderm, floor plate, gut, mesoderm, pharynx, whole organism |                                                                     |
| MA0847.2                    |             | FOXD2        | 5.95155       | 8.14511    | 0.8409947           | 0.869113259         | atagtTaaacat         | atagtCaaacat         | -0.03                | dienecephalon, hindbrain, retina, hypothalamus, brain                |                                                                     |
| MA0877.2                    |             | BARHL1       | 6.34418       | 7.71668    | 0.894731428         | 0.925837941         | Taaacat              | Caaacat              | -0.03                | dienecephalon, hindbrain, retina, hypothalamus, brain                |                                                                     |
| MA0042.2                    |             | FOXl1        | 5.09823       | 6.72807    | 0.844790514         | 0.875928998         | Taaaca               | Caaaca               | -0.03                | head, neural crest, ectoderm, pharyngeal arch, whole organism        |                                                                     |
| MA0032.2                    |             | FOXCl        | 6.30222       | 8.4066     | 0.848093766         | 0.879682651         | agtTaaacat           | agtCaaacat           | -0.03                | head, neural crest, mesenchyme, whole organism                       |                                                                     |
| MA0157.1                    |             | FOXO3        | 8.54581       | 10.2323    | 0.879195868         | 0.935849513         | tTaaaca              | tCaaaca              | -0.06                | brain, eye, head, whole organism                                     |                                                                     |
| MA0040.1                    |             | Foxq1        | 7.82781       | 10.0822    | 0.802278252         | 0.860198535         | agatgtttaAa          | agatgtttaGa          | -0.06                | gut, head, whole organism                                            |                                                                     |
| MA1557.1                    |             | SMAD5        | 0.609555      | 7.56676    | 0.745580575         | 0.853186773         | gttttaAact           | gttttaGact           | -0.11                | whole organism                                                       |                                                                     |
| MA0795.1                    |             | SMAD3        | 0.951196      | 8.30933    | 0.744440214         | 0.855792194         | agtTaaaca            | agtCaaaca            | -0.11                | whole organism                                                       |                                                                     |
| MA0795.1                    |             | SMAD3        | 0.329211      | 8.16277    | 0.735027601         | 0.83537428          | gttttaAact           | gttttaGact           | -0.12                | whole organism                                                       |                                                                     |
| MA1557.1                    |             | SMAD5        | 0.703234      | 8.40279    | 0.747029483         | 0.866117418         | agtTaaaca            | agtCaaaca            | -0.12                | whole organism                                                       |                                                                     |
| Matrix ID                   |             | Name         | Score Pnye    | Score Hsau | Relative score Pnye | Relative score Hsau | TF binding site Pnye | TF binding site Hsau | Delta relative score | Expressed in                                                         |                                                                     |
| 377/447,182                 |             | MA0503.1     | Nkx2-5(var.2) | 8.32873    | 1.14216             | 0.880617794         | 0.670866438          | aacctcaacT           | aacctcaacT           | 0.21                                                                 | heart development                                                   |
|                             |             | MA1535.1     | NR2C1         | 6.27165    | -2.30434            | 0.892190448         | 0.727037684          | tgaGgtgag            | tgaAgtgag            | 0.17                                                                 | whole organism                                                      |
|                             |             | MA1536.1     | NR2C2(var.2)  | 6.28275    | -2.71604            | 0.927943733         | 0.763606498          | gaGgtgag             | gaAgtgag             | 0.16                                                                 | brain, retina, telencephalon                                        |
|                             |             | MA0684.2     | RUNX3         | 9.29699    | 2.98491             | 0.875359761         | 0.734799067          | ctcacTcaact          | ctcacTcaact          | 0.14                                                                 | cranial ganglion, endoderm, mouth, trigeminal ganglion              |
|                             |             | MA0103.2     | ZEBl          | 6.33669    | -1.56717            | 0.852989691         | 0.718798895          | actcacTtc            | actcacTtc            | 0.13                                                                 | cranial ganglion neural plate, pharyngeal arch, somite              |
|                             |             | MA00103.1    | ZEBl          | 6.50331    | 4.03184             | 0.89048913          | 0.792377334          | cacTc                | cacata               | 0.10                                                                 | cranial ganglion neural plate, pharyngeal arch, somite              |
|                             |             | MA0595.1     | SREBF1        | 12.639     | 8.85859             | 0.946416672         | 0.863402917          | ctcacTcac            | ctcacTcac            | 0.08                                                                 | female organism, liver, whole organism                              |
|                             |             | MA0596.1     | SREBF2        | 9.92712    | 6.97638             | 0.874217711         | 0.805305846          | gtgaGgtgag           | gtgaAgtgag           | 0.07                                                                 | liver, whole organism                                               |
|                             |             | MA0018.2     | CREB1         | 7.67419    | 5.90353             | 0.857381977         | 0.792537807          | tgaGgtga             | tgaAgtga             | 0.06                                                                 | brain, whole organism                                               |
|                             |             | MA0672.1     | NKX2-3        | 7.18589    | 4.95442             | 0.879506141         | 0.8412033            | acctcacTc            | acctcacTc            | 0.04                                                                 | pharyngeal arch, pharynx, gut, heart, endoderm, ectoderm            |
|                             |             | MA0642.1     | EN2           | 6.05256    | 4.76108             | 0.856546061         | 0.828558996          | acctcacTc            | acctcacTc            | 0.03                                                                 | midbrain hindbrain boundary, muscle pioneer, somite, whole organism |
|                             |             | MA0673.1     | NKX2-8        | 6.08795    | 4.83714             | 0.880624971         | 0.858007585          | ccactcacT            | ccactcacT            | 0.02                                                                 | NA                                                                  |

|                                                                                                                                                                                  |               |           |          |             |             |               |               |       |                                                                       |
|----------------------------------------------------------------------------------------------------------------------------------------------------------------------------------|---------------|-----------|----------|-------------|-------------|---------------|---------------|-------|-----------------------------------------------------------------------|
| MA0060.3                                                                                                                                                                         | NFYA          | 9.23508   | 8.31244  | 0.87125057  | 0.854405155 | aaccactcaC    | aaccactcaT    | 0.02  | whole organism                                                        |
| MA1645.1                                                                                                                                                                         | NKX2-2        | 11.9875   | 11.5544  | 0.915185879 | 0.90589929  | aaaccactcaCtC | aaaccactcaTtC | 0.01  | central nervous system, whole organism                                |
| MA0063.2                                                                                                                                                                         | NKX2-5        | 8.7177    | 8.33619  | 0.880059179 | 0.871484624 | aaccactcaCt   | aaccactcaT    | 0.01  | heart development                                                     |
| MA1644.1                                                                                                                                                                         | NFYC          | 9.01229   | 8.69976  | 0.861241272 | 0.854550606 | aaccactcaC    | aaccactcaT    | 0.01  | whole organism                                                        |
| MA1108.2                                                                                                                                                                         | MX1           | 5.65246   | 5.79324  | 0.869655466 | 0.872285951 | Ctcaactat     | Ttcaactat     | 0.00  | central nervous system                                                |
| MA0498.2                                                                                                                                                                         | MEIS1         | 3.09338   | 3.49889  | 0.846253803 | 0.854841342 | Ctcaact       | Ttcaact       | -0.01 | eye, hindbrain, midbrain, whole organism                              |
| MA0033.1                                                                                                                                                                         | FOXJ1         | 4.66175   | 7.13362  | 0.816302338 | 0.928332544 | Ctcaata       | Ttcaata       | -0.11 | brain, lateral mesoderm, whole organism                               |
| MA0673.1                                                                                                                                                                         | NKX2-8        | 1.17062   | 7.38472  | 0.791708566 | 0.904073433 | ctcaCtcaC     | tcaCtcaC      | -0.11 | NA                                                                    |
| MA0572.1                                                                                                                                                                         | NKX2-3        | -2.77091  | 5.71387  | 0.708599167 | 0.854239082 | ctcaCtcaC     | tcaCtcaC      | -0.15 | pharyngeal arch, pharynx, gut, heart, endoderm, ectoderm              |
| MA1116.1                                                                                                                                                                         | RBPJ          | -1.2426   | 6.25456  | 0.697539026 | 0.854249174 | tatgtgaGgt    | tatgtgaAgt    | -0.16 | eye, head, midbrain, whole organism                                   |
| MA0122.1                                                                                                                                                                         | Nkx3-2        | 3.0401    | 7.40439  | 0.712259854 | 0.875128167 | tgaGgtgag     | tgaAgtgag     | -0.16 | whole organism, pharyngeal arch, head                                 |
| MA0080.1                                                                                                                                                                         | SP1           | 0.28851   | 5.22724  | 0.64655272  | 0.853812965 | gtgaGg        | gtgaAg        | -0.21 | mesoderm, kidney, liver, yolk, brain, whole organism                  |
| <b>Matrix ID Name Score Pdem Score Pcsya Relative score Pdem Relative score Pcsya TF binding site Pdem TF binding site Pcsya Delta relative score Expressed in</b>               |               |           |          |             |             |               |               |       |                                                                       |
| MA1563.1                                                                                                                                                                         | SOM18         | 6.81323   | -1.63717 | 0.906722669 | 0.692731646 | gcactGa       | gcactCa       | 0.21  | axial blood vessel, mesoderm, vasculature, mesoderm                   |
| MA0258.2                                                                                                                                                                         | ESR2          | 11.3201   | 0.66006  | 0.879314902 | 0.738489098 | ggggcactGacaa | ggggcactCacaa | 0.14  | epidermis, eye, head, hindbrain, intestine, neuromast                 |
| MA0498.2                                                                                                                                                                         | MEIS1         | 9.15158   | 3.28184  | 0.974548901 | 0.850244831 | ctCacaa       | ctCacaa       | 0.12  | eye, hindbrain, midbrain, whole organism                              |
| MA0078.1                                                                                                                                                                         | Sox17         | 7.94585   | 7.25479  | 0.88001473  | 0.857690041 | ctcttttG      | ctcttttG      | 0.02  | endoderm, whole organism, forerunner cell group, whole organism       |
| MA0514.1                                                                                                                                                                         | Sox3          | 6.01595   | 4.5974   | 0.854683972 | 0.833688976 | tcttttGag     | tcttttGag     | 0.02  | whole organism                                                        |
| MA0867.2                                                                                                                                                                         | SOX4          | 11.0411   | 9.95213  | 0.938272066 | 0.918783756 | ctCacaaagag   | ctCacaaagag   | 0.02  | central nervous system, neural crest, retina, whole organism          |
| MA1152.1                                                                                                                                                                         | SOX15         | 7.75991   | 7.20016  | 0.872336806 | 0.859767783 | tcttttGag     | tcttttGag     | 0.01  | NA                                                                    |
| MA0143.3                                                                                                                                                                         | Sox2          | 5.84852   | 5.36525  | 0.85600148  | 0.847428732 | tcttttG       | tcttttG       | 0.01  | brain, central nervous system, ectoderm, eye, whole organism          |
| MA0442.2                                                                                                                                                                         | SOX10         | 10.8112   | 11.0347  | 0.925670276 | 0.930464217 | ctCacaaagag   | ctCacaaagag   | 0.00  | melanocyte, neural crest                                              |
| MA1536.1                                                                                                                                                                         | NR2C2(var.2)  | 0.0582905 | 3.1657   | 0.814271689 | 0.871019615 | Cagtgtgc      | Gagtgtgc      | -0.06 | brain, retina, telencephalon                                          |
| MA1523.1                                                                                                                                                                         | MSANTD3       | 8.31141   | 12.4667  | 0.860467632 | 0.963218731 | gcactGac      | gcactCac      | -0.10 | NA                                                                    |
| MA0672.1                                                                                                                                                                         | NKX2-3        | -0.714415 | 5.64268  | 0.743898583 | 0.853017086 | gcactGac      | gcactCac      | -0.11 | pharyngeal arch, pharynx, gut, heart, endoderm, ectoderm              |
| MA0122.1                                                                                                                                                                         | Nkx3-2        | 4.35322   | 7.40332  | 0.76126339  | 0.875088057 | gtGagtgtg     | gtGagtgtg     | -0.11 | whole organism, pharyngeal arch, head                                 |
| MA0063.2                                                                                                                                                                         | NKX2-5        | 2.69959   | 8.24359  | 0.744803164 | 0.869403459 | gcactGac      | gcactCac      | -0.12 | heart development                                                     |
| MA0914.1                                                                                                                                                                         | ISL2          | 1.70121   | 6.90615  | 0.731750204 | 0.867167025 | gcactGac      | gcactCac      | -0.14 | brain, CaP motoneuron, motor neuron, neural tube, whole organism      |
| MA0673.1                                                                                                                                                                         | NKX2-8        | -1.10024  | 6.47318  | 0.750646241 | 0.887590817 | gcactGac      | gcactCac      | -0.14 | NA                                                                    |
| <b>Rel. Pos./</b>                                                                                                                                                                |               |           |          |             |             |               |               |       |                                                                       |
| <b>LM (90 bp)</b>                                                                                                                                                                |               |           |          |             |             |               |               |       |                                                                       |
| <b>Pos. Scaffold Matrix ID Name Score Pdem Score Pcsya Relative score Pdem Relative score Pcsya TF binding site Pdem TF binding site Pcsya Delta relative score Expressed in</b> |               |           |          |             |             |               |               |       |                                                                       |
| MA1542.1                                                                                                                                                                         | OSR1          | 8.15      | 0.06     | 0.88        | 0.74        | agCttctgt     | agAttctgt     | 0.14  | whole organism, mesoderm, brain, endoderm, blood vasculature          |
| MA0080.1                                                                                                                                                                         | SP1           | 5.63      | 2.42     | 0.87        | 0.74        | cagaaG        | cagaaT        | 0.13  | blood, lateral mesoderm, liver, leukocyte, ventral mesoderm, yolk     |
| MA1646.1                                                                                                                                                                         | OSR2          | 12.57     | 6.88     | 0.94        | 0.81        | tagcagaaGctg  | tagcagaaTctg  | 0.13  | gut, fins, pronephric duct                                            |
| MA0461.1                                                                                                                                                                         | Atoh1         | 4.58      | -3.88    | 0.86        | 0.73        | aaGctggt      | aaTctggt      | 0.13  | whole organism, brain, macula, spinal cord                            |
| MA1468.1                                                                                                                                                                         | ATOH7         | 7.04      | 0.38     | 0.86        | 0.74        | agCttctgt     | agAttctgt     | 0.12  | eye, retina, whole organism                                           |
| MA0522.1                                                                                                                                                                         | Tcf3          | 4.93      | -4.08    | 0.85        | 0.73        | accagCttctg   | accagAttctg   | 0.12  | whole organism                                                        |
| MA0499.1                                                                                                                                                                         | MyoD1         | 5.13      | -4.17    | 0.86        | 0.74        | accagCttctg   | accagAttctg   | 0.12  | whole organism, eye, fin, mesoderm, muscle                            |
| MA1100.1                                                                                                                                                                         | ASCL1         | 9.31      | 2.70     | 0.86        | 0.75        | gcagaaGctggtg | gcagaaTctggt  | 0.11  | whole organism, gut, brain, eye                                       |
| MA0816.1                                                                                                                                                                         | Ascl2         | 8.54      | 3.20     | 0.85        | 0.74        | accagCttct    | accagAttct    | 0.11  | NA                                                                    |
| MA1472.1                                                                                                                                                                         | BHLHA15(var)  | 7.41      | 2.69     | 0.87        | 0.77        | agCttctgt     | agAttctgt     | 0.10  | exocrine pancreas, hatching gland, hindbrain, polster, whole organism |
| MA1472.1                                                                                                                                                                         | BHLHA15(var)  | 7.41      | 5.74     | 0.87        | 0.84        | agaaGctggt    | agaaTctggt    | 0.03  | exocrine pancreas, hatching gland, hindbrain, polster, whole organism |
| MA0719.1                                                                                                                                                                         | RHOXF1        | 1.72      | 2.77     | 0.84        | 0.86        | agaaGctg      | agaaTctg      | -0.02 | NA                                                                    |
| MA0145.3                                                                                                                                                                         | TFCP2         | 7.61      | 9.85     | 0.84        | 0.89        | caaccagCtt    | caaccagAtt    | -0.04 | NA                                                                    |
| MA0145.3                                                                                                                                                                         | TFCP2         | 5.54      | 8.46     | 0.81        | 0.86        | aaGctggtt     | aaTctggtt     | -0.05 | NA                                                                    |
| MA0623.1                                                                                                                                                                         | Neurog1       | 4.91      | 7.31     | 0.82        | 0.87        | agaaGctggt    | agaaTctggt    | -0.06 | whole organism, neural crest, brain, ectoderm, retina                 |
| MA0827.1                                                                                                                                                                         | DUG3          | 3.49      | 7.55     | 0.80        | 0.87        | accagCttct    | accagAttct    | -0.07 | brain, rhombomere, spinal cord                                        |
| MA0035.1                                                                                                                                                                         | Gata1         | 1.43      | 5.19     | 0.69        | 0.90        | agCttc        | agAttc        | -0.20 | gut, pectoral fin, pronephric duct                                    |
| MA0036.1                                                                                                                                                                         | GATA2         | -0.43     | 4.45     | 0.59        | 0.87        | agCtt         | agAtt         | -0.28 | brain, blood vasculature, eye, gut, liver                             |
| <b>Matrix ID Name Score Pdem Score Pcsya Relative score Pdem Relative score Pcsya TF binding site Pdem TF binding site Pcsya Delta relative score Expressed in</b>               |               |           |          |             |             |               |               |       |                                                                       |
| MA0820.1                                                                                                                                                                         | FIGLA         | 7.06      | 5.39     | 0.86        | 0.82        | Accactctc     | Ccactctc      | 0.03  | gonad, ovary, testis                                                  |
| MA0130.1                                                                                                                                                                         | ZNF354C       | 6.33      | 5.92     | 0.89        | 0.87        | gAccac        | gCccac        | 0.02  | NA                                                                    |
| MA1536.1                                                                                                                                                                         | NR2C2(var.2)  | 5.27      | 4.80     | 0.91        | 0.90        | gaggtgG       | gaggtgG       | 0.01  | brain, retina, telencephalon                                          |
| MA0522.2                                                                                                                                                                         | TCF3          | 4.86      | 4.45     | 0.85        | 0.84        | Accactctc     | Ccactctc      | 0.01  | whole organism                                                        |
| MA1116.1                                                                                                                                                                         | RBPJ          | 6.42      | 6.41     | 0.86        | 0.86        | Tctcgaagc     | Gctcgaagc     | 0.00  | head, midbrain, otic vesicle, whole organism, eye                     |
| MA1558.1                                                                                                                                                                         | SNAI1         | 6.12      | 6.75     | 0.86        | 0.87        | aggaaggtgT    | aggaaggtgG    | -0.01 | eye, heart, mesoderm, germ ring, whole organism                       |
| MA1648.1                                                                                                                                                                         | TCF12(var.2)  | 8.34      | 8.92     | 0.87        | 0.88        | Accactctc     | Ccactctc      | -0.01 | brain, neural tube, pectoral fin, spinal cord                         |
| MA0522.3                                                                                                                                                                         | TCF3          | 8.46      | 9.16     | 0.87        | 0.89        | Accactctc     | Ccactctc      | -0.02 | whole organism                                                        |
| MA1522.1                                                                                                                                                                         | MAZ           | 6.51      | 7.57     | 0.85        | 0.86        | Accactctc     | Ccactctc      | -0.02 | brain, whole organism                                                 |
| MA0103.3                                                                                                                                                                         | ZEB1          | 5.38      | 6.69     | 0.84        | 0.86        | Accactctc     | Ccactctc      | -0.02 | neural plate, whole organism                                          |
| MA0079.3                                                                                                                                                                         | SP1           | 2.66      | 8.44     | 0.81        | 0.89        | agAccactctc   | agCccactctc   | -0.07 | whole organism                                                        |
| MA0671.1                                                                                                                                                                         | NFIX          | -4.73     | 4.57     | 0.63        | 0.85        | gcagAccac     | gcagCccac     | -0.22 | midbrain, muscle, central nervous system, whole organism              |
| <b>Matrix ID Name Score Pdem Score Pcsya Relative score Pdem Relative score Pcsya TF binding site Pdem TF binding site Pcsya Delta relative score Expressed in</b>               |               |           |          |             |             |               |               |       |                                                                       |
| MA0745.1                                                                                                                                                                         | SNAI2         | 7.30      | -3.01    | 0.89        | 0.69        | ctcagGtt      | ctcagCtt      | 0.21  | neural crest                                                          |
| MA1569.1                                                                                                                                                                         | TFAP2E        | 3.85      | -5.00    | 0.85        | 0.73        | tcctcagGtt    | tcctcagCtt    | 0.12  | melanocyte, melanoblast, neural crest                                 |
| MA1569.1                                                                                                                                                                         | TFAP2E        | 3.68      | -5.17    | 0.85        | 0.73        | aaCctgagggg   | aaGctgagggg   | 0.12  | melanocyte, melanoblast, neural crest                                 |
| MA0003.4                                                                                                                                                                         | TFAP2A        | 11.91     | 6.05     | 0.89        | 0.78        | gttccctcagGtt | gttccctcagCtt | 0.12  | ectoderm, neural crest                                                |
| MA1118.1                                                                                                                                                                         | SIX1          | 13.14     | 7.57     | 0.92        | 0.81        | gaaaCctgagg   | gaaaGctgagg   | 0.11  | brain, central nervous system, whole organism                         |
| MA0814.1                                                                                                                                                                         | TFAP2C(var.2) | 7.14      | 1.63     | 0.86        | 0.77        | aaCctgagggg   | aaGctgagggg   | 0.09  | NA                                                                    |
| MA0003.3                                                                                                                                                                         | TFAP2A        | 6.90      | 1.82     | 0.86        | 0.78        | aaCctgagggg   | aaGctgagggg   | 0.08  | ectoderm, neural crest                                                |
| MA0103.1                                                                                                                                                                         | ZEB1          | 5.49      | 5.09     | 0.85        | 0.83        | aaCctg        | cagCtt        | 0.02  | neural plate, whole organism                                          |
| MA0035.2                                                                                                                                                                         | Gata1         | 6.22      | 6.81     | 0.85        | 0.86        | agagagaaaC    | agagagaaaG    | -0.01 | mesoderm, blood, tail bud, whole organism                             |
| MA0482.1                                                                                                                                                                         | Gata4         | 4.99      | 6.44     | 0.84        | 0.86        | Gtttctctg     | Ctttctctg     | -0.02 | endoderm                                                              |
| MA0514.1                                                                                                                                                                         | Sox3          | 1.70      | 8.81     | 0.79        | 0.90        | gTttctctc     | gTttctctc     | -0.11 | whole organism                                                        |
| MA0508.3                                                                                                                                                                         | PRDM1         | 7.21      | 13.33    | 0.83        | 0.95        | agGtttctctc   | agGtttctctc   | -0.12 | ectoderm, epidermis, neural crest,                                    |
| MA0039.1                                                                                                                                                                         | Klf4          | 3.65      | 7.76     | 0.76        | 0.88        | agagagaaaC    | agagagaaaG    | -0.12 | epidermis                                                             |
| MA0500.1                                                                                                                                                                         | Myog          | -4.50     | 4.63     | 0.73        | 0.86        | gaaaCctgagg   | gaaaGctgagg   | -0.12 | mesoderm, mostly muscles                                              |
| MA0719.1                                                                                                                                                                         | RHOXF1        | -3.61     | 3.43     | 0.73        | 0.87        | gaaaCctg      | gaaaGctg      | -0.14 | NA                                                                    |
| MA0842.1                                                                                                                                                                         | NRL           | 0.05      | 7.12     | 0.70        | 0.85        | agaaaCctgag   | agaaaGctgag   | -0.15 | retina, lens                                                          |
| MA0117.1                                                                                                                                                                         | MafB          | 3.27      | 7.31     | 0.73        | 0.91        | Cctgaggg      | Gctgaggg      | -0.18 | neural crest                                                          |
| MA0442.1                                                                                                                                                                         | SOX10         | 2.53      | 6.64     | 0.72        | 0.90        | Gtttct        | Ctttct        | -0.18 | melanocyte, neural crest                                              |

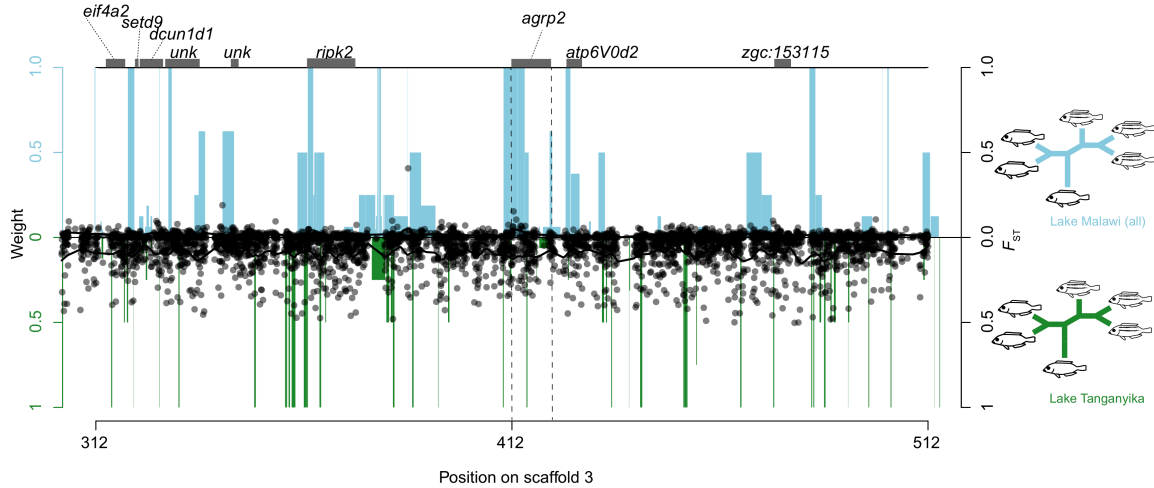

1  
2 **Fig. S1.  $F_{ST}$  plot of all Lake Malawi and Lake Tanganyika species.** Association of  
3 stripes with genomic regions. Black dots represent midpoints of every associated region  
4 ( $F_{ST}$  value) and black lines are smoothed local regressions between striped and non-  
5 striped species from Lake Malawi (top) and Lake Tanganyika species (bottom). This is  
6 plotted together with topology weights for topologies in which striped and non-striped  
7 species are reciprocally monophyletic (blue bars Lake Malawi, green bars Lake  
8 Tanganyika). Each value is giving the proportionate contribution of a particular taxon tree  
9 to the full tree with values ranging from 0 to 1. An example for such a topology in which  
10 striped species are reciprocally monophyletic is provided at the right for both radiations.  
11

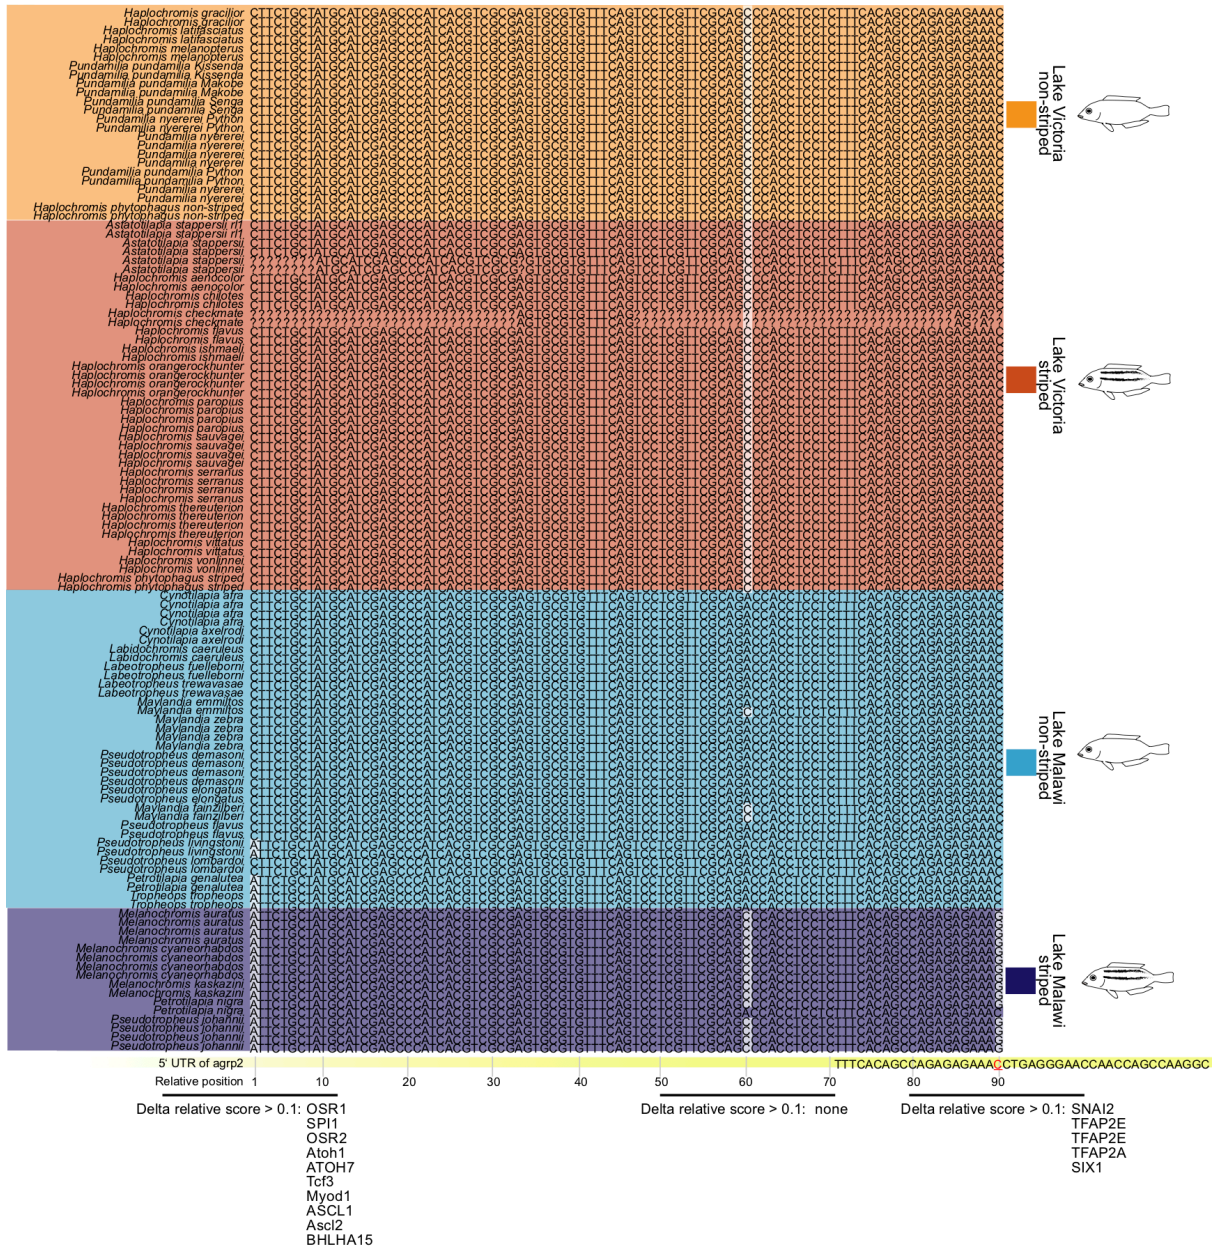

12  
 13 **Fig. S2. The *de novo* mutations in Lake Malawi mbuna may alter *agrp2* expression.**  
 14 Alignment of candidate region LM for Lake Malawi mbuna (blue), all Lake Victoria  
 15 species as well as their ancestral lineages (orange). There are three SNPs within this 90  
 16 bp region (highlighted in white) with one of them aligning to the 5'UTR of *agrp2* (yellow  
 17 bar at the bottom). All TFBSs predicted by JASPAR for each variant +/-10 bp of this  
 18 variant are given below (see also Table S2). While TFBSs for variants one and two  
 19 (relative positions 1 and 60) are expressed in tissues such as the brain or gut (Table  
 20 S2), predicted TFBSs at the third variant (relative position 90) are expressed in the  
 21 neural crest, skin or in melanocytes (Table S2).



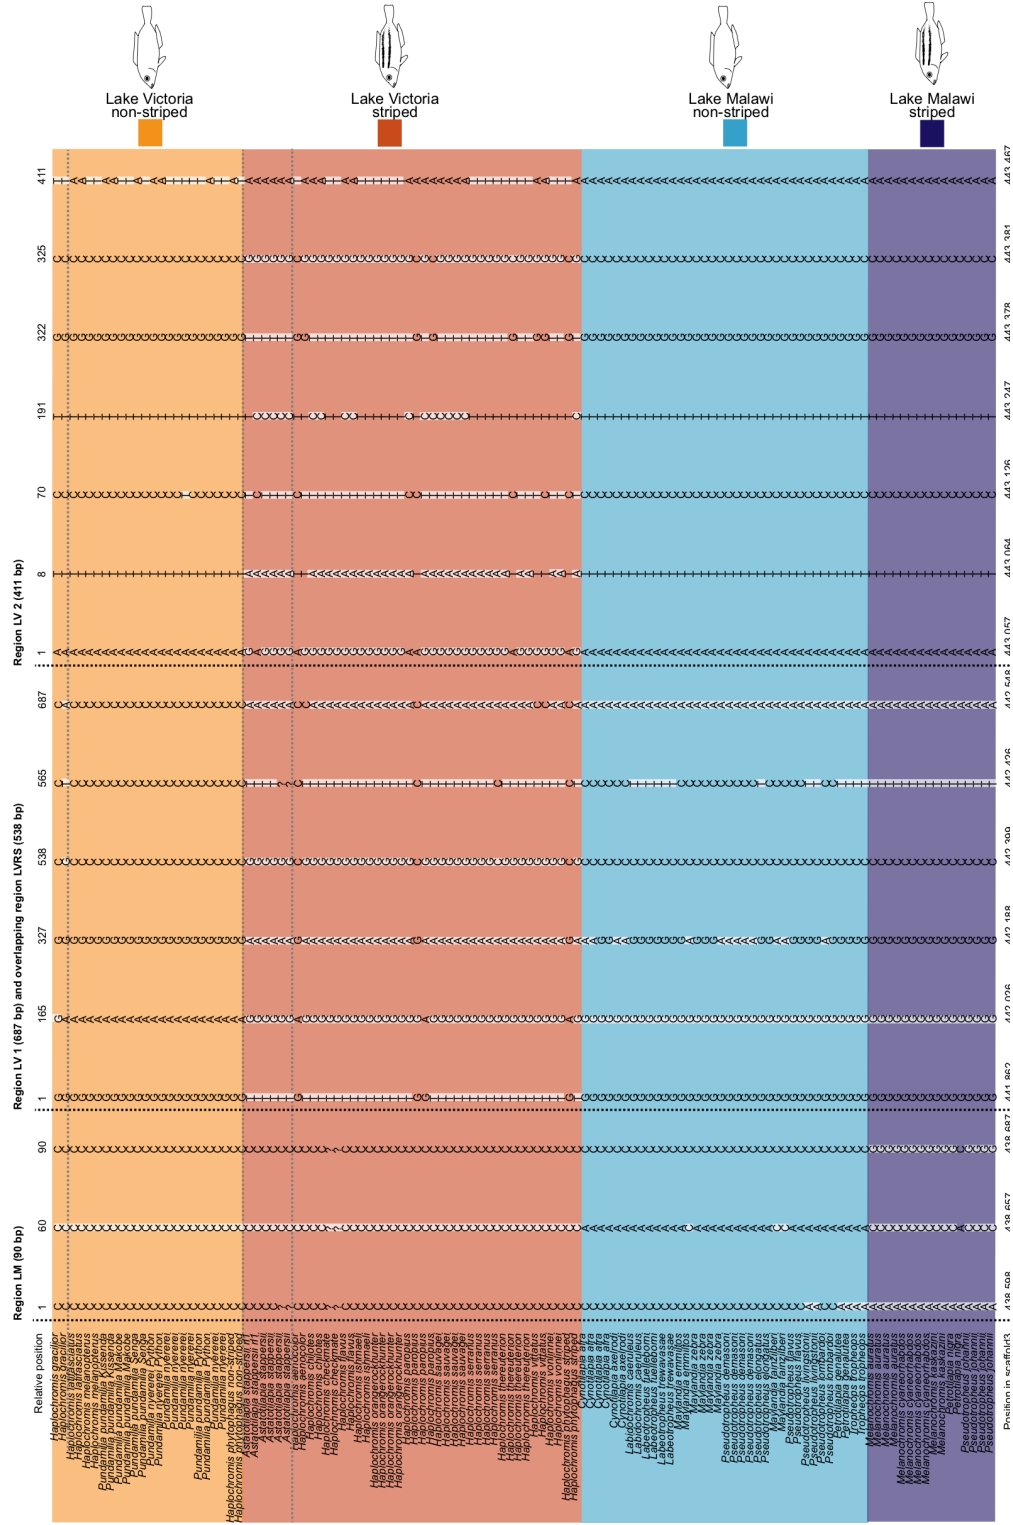

**Fig. S3. Most variants within regions LM, LV 1, LV 2 and LVR5 are not shared between Lakes Victoria and Malawi.** Highly associated variants in region LM are unique in Lake Malawi and likely evolved de novo (see also Fig. 3, Fig. S2). For regions LV 1, LV 2 and LVR5 the non-striped ancestral species *H. gracilior* is polymorphic for most variants which are highly differentiated between Lake Victoria striped and non-striped species. These results suggest that regulatory evolution via different routes lead to the repeated evolution of horizontal stripes in the two independent radiations of Lake Malawi and Lake Victoria cichlids.
